# Supplementary material for: Lipid droplet formation in Mycobacterium tuberculosis infected macrophages requires IFN-γ/HIF-1α signaling and supports host defense
Source: PubMed Central journal article supplement (PMC5800697; doi:10.1371/journal.ppat.1006874), 2018-01-25

Figure S3

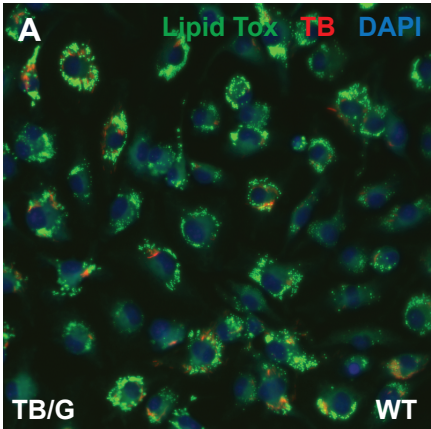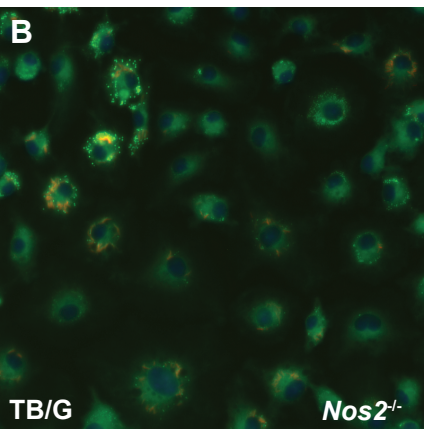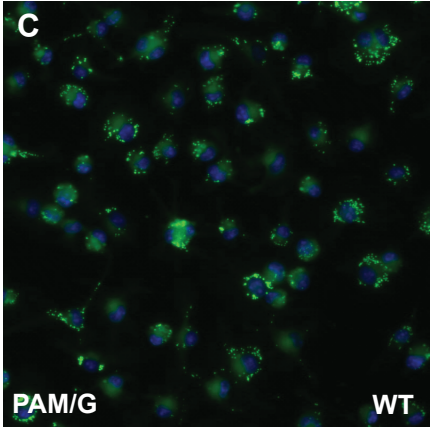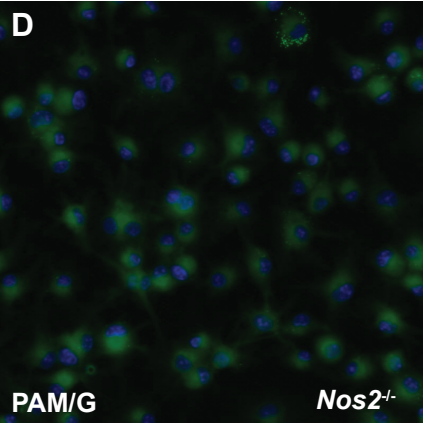

Supplement: ppat.1006874.s003.pdf [file ppat.1006874.s003.pdf]
